# Supplementary material
Source: HighWire-hosted journal article supplement (https://mbio.asm.org/content/3/1/e00305-11)

# SCCmec type

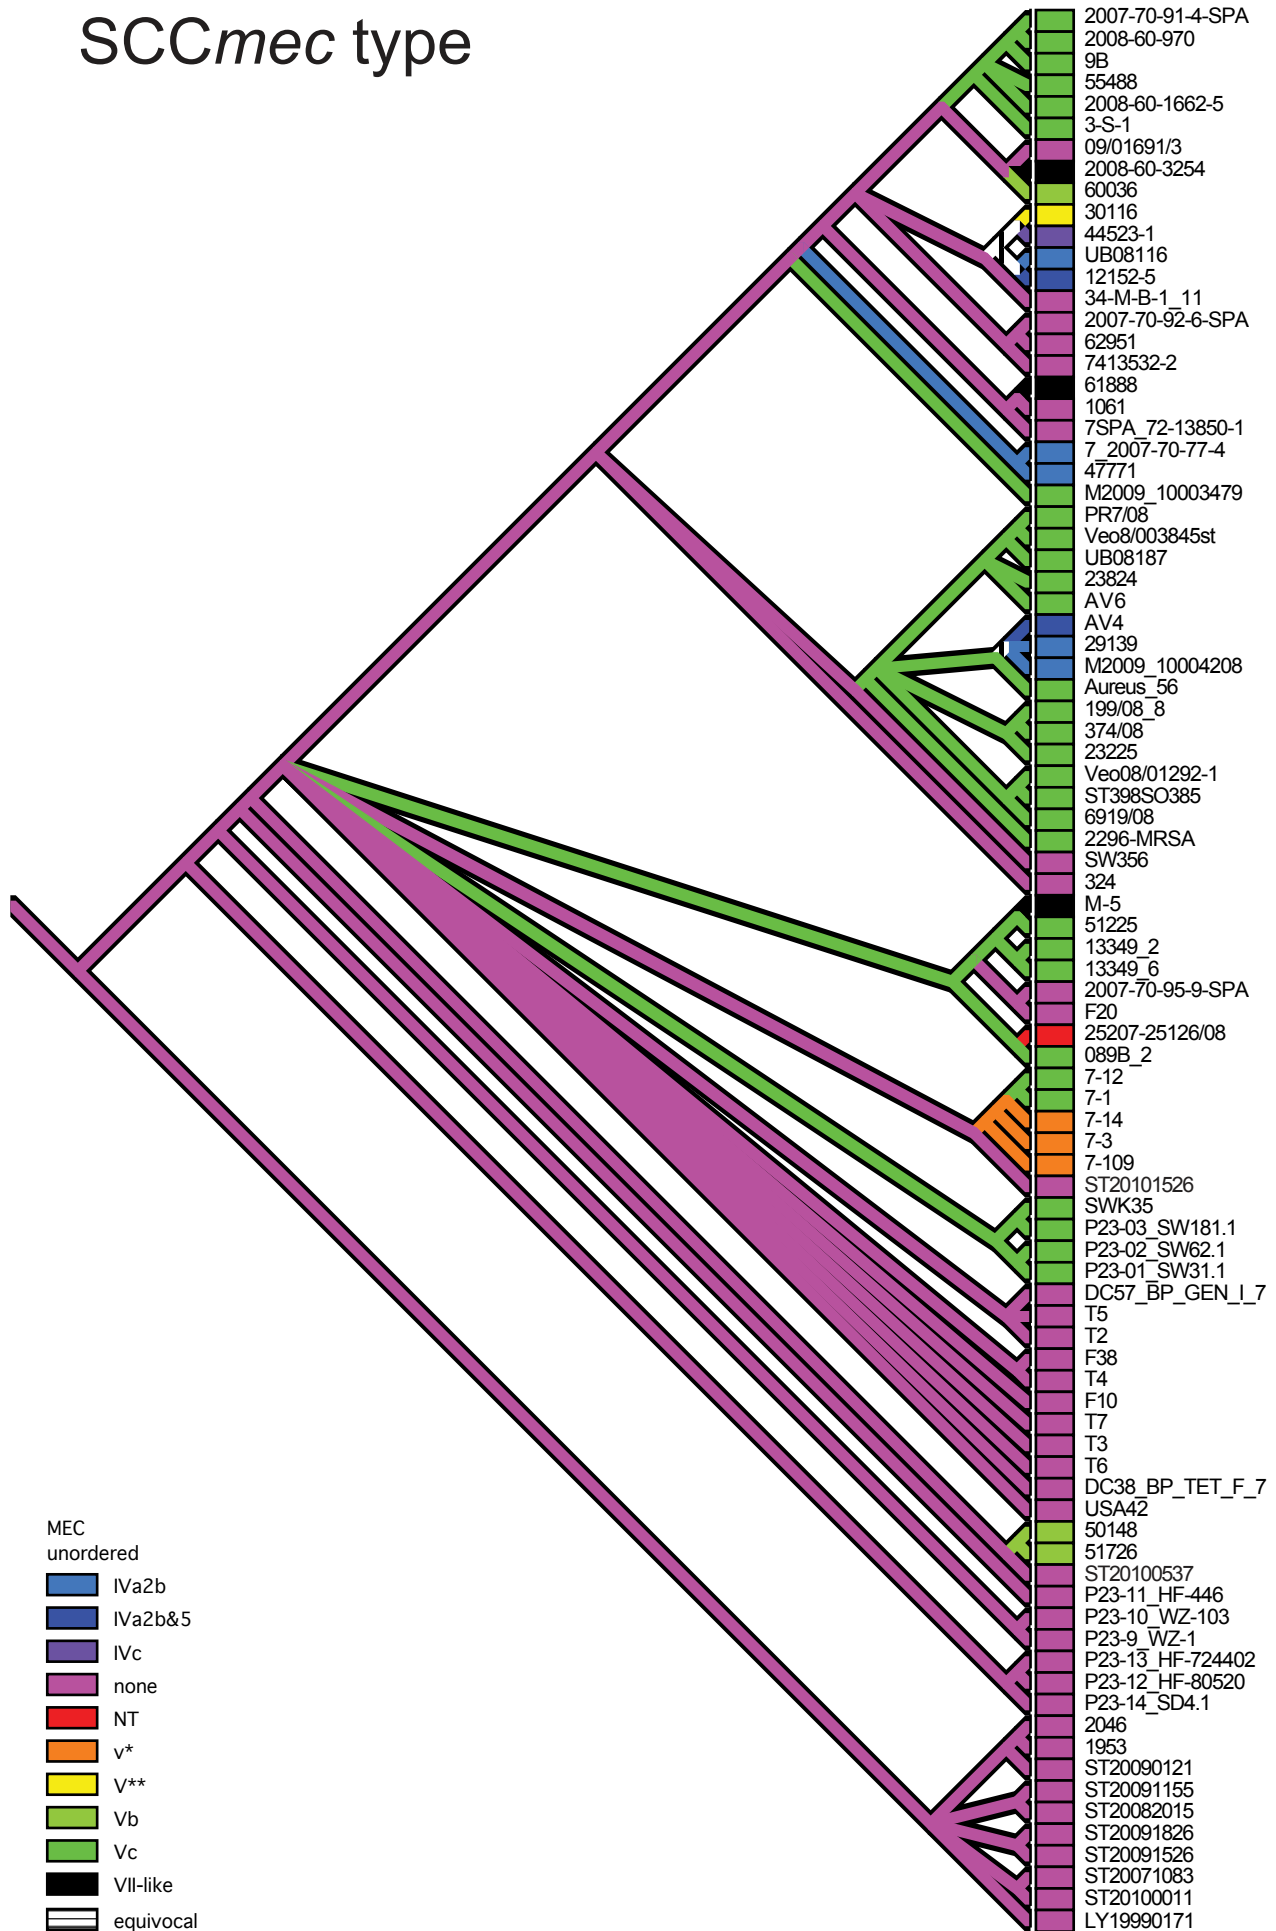

Supplement: inline-supplementary-material-8 [file inline-supplementary-material-8.pdf]
